# Supplementary material
Source: PubMed Central journal article supplement (PMC3457512)
Supplement: AEM.01727-12_zam999103694so1.pdf [file AEM.01727-12_zam999103694so1.pdf]

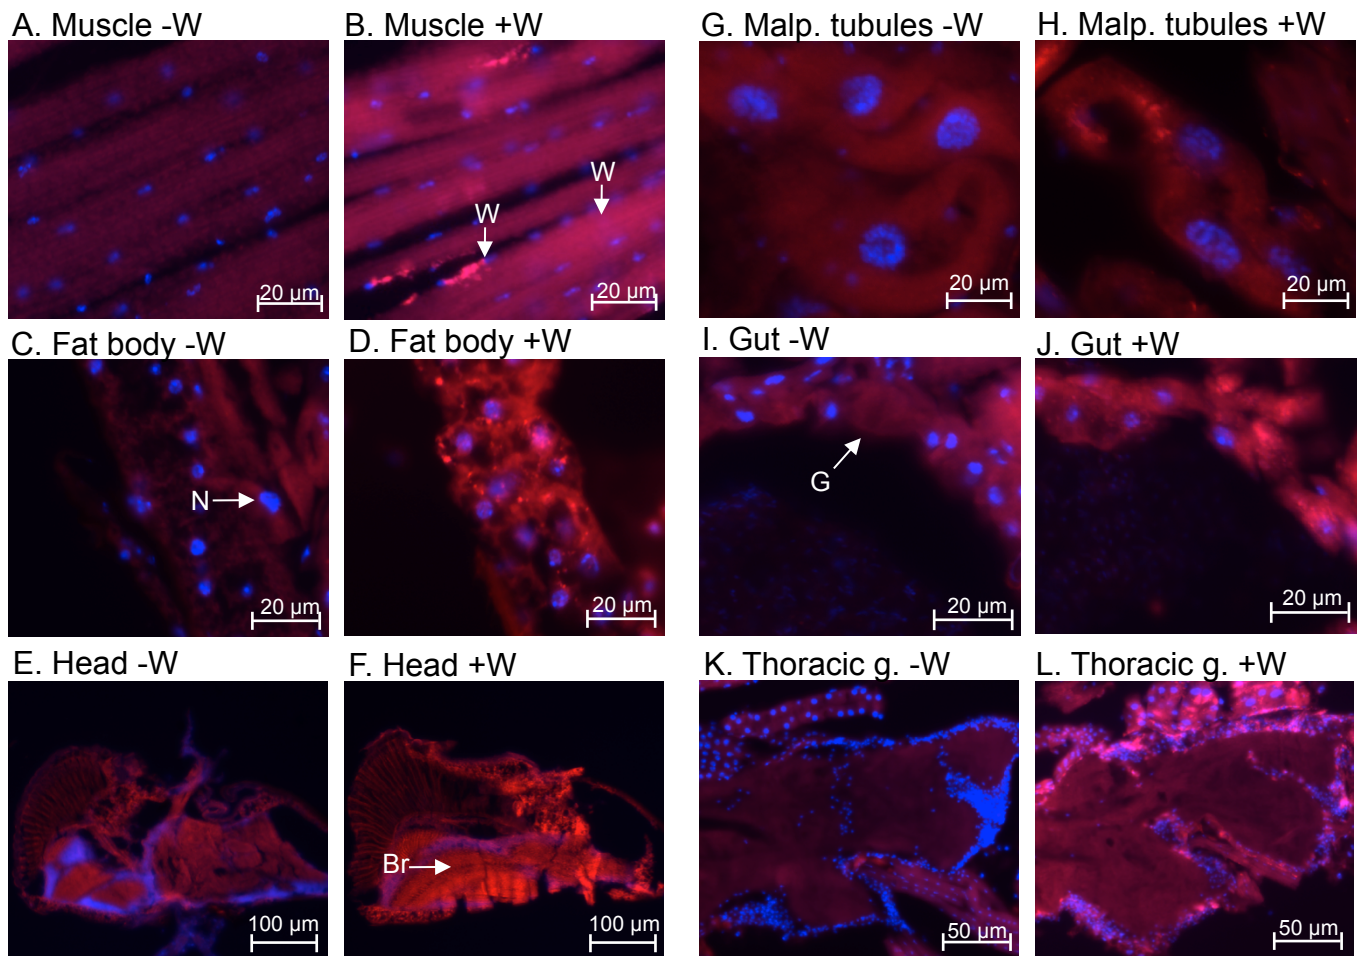

**Figure S1: *Wolbachia* distribution in somatic tissues in CO:wAu flies (+W).** Negative controls that do not contain *Wolbachia* (-W) are included for each tissue (A, C, E, G, I, K). Flies that contain *Wolbachia* are shown in (B, D, F, H, J, L), punctate red staining indicates *Wolbachia* presence in tissues. Diffuse red staining of increased intensity compared to that observed in the negative control images indicates *Wolbachia* presence in the tissue above or below the plane of focus. Nucleic acid (N - nucleus) is stained blue using DAPI. Images were processed by fluorescent *in situ* hybridization, using two rhodamine-labeled probes to target conserved regions of the *Wolbachia* 16S rRNA gene. The brain (Br - brain) and gut (G - gut) have also been labeled for ease of viewing. Images shown are representative of four biological replicates. Each paired tissue set (ie, A and B; C and D; E and F etc) were taken under the same magnification and exposure. Due to the size difference in organs of interest, magnification differs across tissues. Auto-fluorescence varies with respect to tissue type, so exposure varies between, but not within, tissue sets. All images have been cropped and resized but otherwise remain unaltered. Malpighian tubules (Malp. tubules) and thoracic ganglia (Thoracic g.) have been abbreviated in the panel labels.
